# Supplementary material
Source: MDPI journal article supplement (https://www.mdpi.com/2304-6740/10/10/150)
Supplement: s1 [file s1]

# Capture Mechanism of Cadmium in Agricultural Soil via Iron-Modified Graphene

Hongrui Wang <sup>1,2</sup>, Junping Hu <sup>3</sup>, Wentao Zhou <sup>1</sup>, Pan Long <sup>1</sup>, Xin Ma <sup>4</sup>, Feng Zhang <sup>5</sup>,  
Yuping Wu <sup>6</sup>, Xiongwei Wu <sup>5,\*</sup>, Jiayu Dai <sup>2,\*</sup> and Zhiqiang Fu <sup>1,\*</sup>

<sup>1</sup> College of Agronomy, Hunan Agricultural University, Changsha 410128, China

<sup>2</sup> Department of Physics, National University of Defense Technology, Changsha 410128, China

<sup>3</sup> College of Resource and Environmental, Hunan Agricultural University, Changsha 410128, China

<sup>4</sup> Hunan Provincial Key Laboratory of Efficient and Clean Utilization of Manganese Resources, College of Chemistry and Chemical Engineering, Central South University, Changsha 410083, China

<sup>5</sup> School of Chemistry and Materials Science, Hunan Agricultural University, Changsha 410128, China

<sup>6</sup> School of Energy and Environment, Southeast University, Nanjing, 211189, China

\* Correspondence: wxw@hunau.edu.cn (X.W.); jyundai@nudt.edu.cn (J.D.); zqf\_cis@hunau.edu.cn (Z.F.)

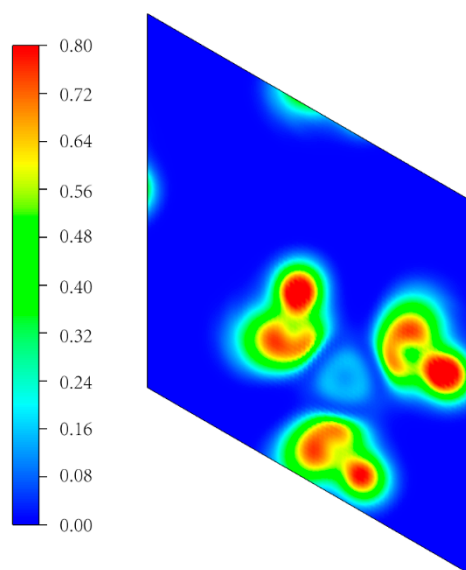

**Figure S1.** ELF diagram of the top view of Fe@G.

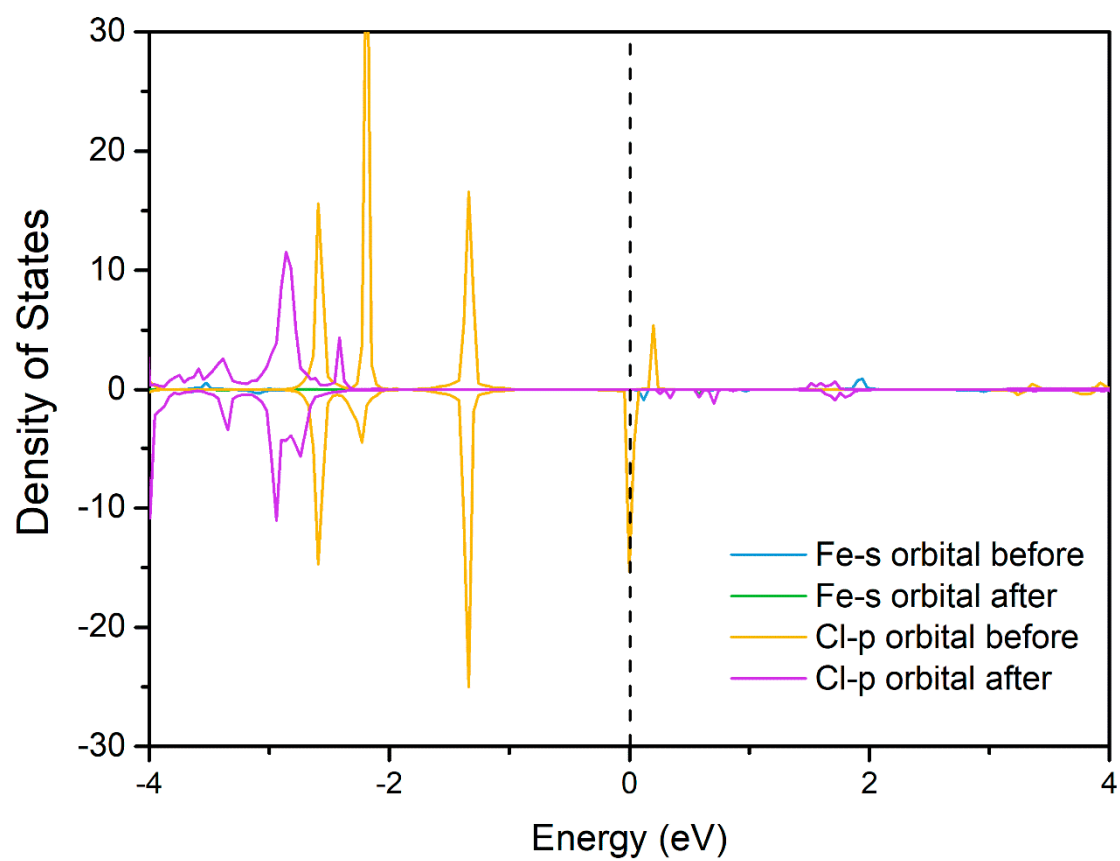

**Figure S2.** The partial density of states of CdCl<sub>2</sub> adsorbed on Fe@G.

**Table S1.** The number of charge transfers of the pure CdCl<sub>2</sub>, and adsorbed on substrates.

| Charge | Cd    | Cl   | Cl   |
|--------|-------|------|------|
| pure   | 18.98 | 7.51 | 7.51 |
| G      | 18.99 | 7.51 | 7.51 |
| Fe@G   | 18.84 | 7.56 | 7.61 |
